# Supplementary material for: The Factors Associated with 3-Year Mortality Stratified by Physical and Mental Multimorbidity and Area of Residence Deprivation in Primary Care Community-Living Older Adults
Source: PubMed Central journal article supplement — J Aging Health. 2021 Mar 27;33(7-8):545–56. doi: 10.1177/0898264321997715 (PMC8236670; doi:10.1177/0898264321997715), 2021-03-27
Supplement: sj-pdf-1-jah-10.1177_0898264321997715.pdf [file sj-pdf-1-jah-10.1177_0898264321997715.pdf]

Supplemental Material.

**Supplemental table S1. Primary, secondary and tertiary causes of death reported.**

|                             | Primary causes of<br>death<br>n=105 | Secondary causes<br>of death<br>n=87 | Tertiary causes of<br>death<br>n=60 |
|-----------------------------|-------------------------------------|--------------------------------------|-------------------------------------|
| Cancer                      | 48 (45.7%)                          | 31 (35.6%)                           | 6 (10.0%)                           |
| Cardiovascular disorders    | 17 (16.2%)                          | 24 (27.6%)                           | 15 (25.0%)                          |
| Infectious diseases         | 12 (11.4%)                          | 5 (5.7%)                             | 5 (8.3%)                            |
| Neurological disorders      | 11 (10.5%)                          | 6 (6.9%)                             | 6 (10.0%)                           |
| Respiratory tract disorders | 9 (8.6%)                            | 18 (20.7%)                           | 15 (25.0%)                          |
| Others                      | 8 (7.6%)                            | 3 (3.4%)                             | 13 (21.7%)                          |

**Supplemental table S2. Mortality and physical conditions by physical and mental multimorbidity, N=1570**

|                                           | ≤1 physical condition or ≤1 mental disorder (n=81) |           |                      | ≥2 physical conditions without a mental disorder (n= 946) |           |                      | ≥2 physical conditions with a mental disorder (n= 543) |           |                      |
|-------------------------------------------|----------------------------------------------------|-----------|----------------------|-----------------------------------------------------------|-----------|----------------------|--------------------------------------------------------|-----------|----------------------|
|                                           | Death No                                           | Death Yes | p-value <sup>a</sup> | Death No                                                  | Death Yes | p-value <sup>b</sup> | Death No                                               | Death Yes | p-value <sup>b</sup> |
|                                           | n=79                                               | n=2       |                      | n=884                                                     | n=62      |                      | n=502                                                  | n=41      |                      |
| Number of physical conditions (Mean ± SD) | 0.7 ± 0.4                                          | 0.5 ± 0.7 | 0.44                 | 5.1 ± 2.1                                                 | 6.4 ± 2.4 | <0.001               | 6.1 ± 2.3                                              | 6.6 ± 2.4 | 0.15                 |
| Arthropathy                               | 2 (2%)                                             | 0         | 1.00                 | 444 (50%)                                                 | 37 (60%)  | 0.15                 | 301 (60%)                                              | 24 (58%)  | 0.86                 |
| Cancer                                    | 5 (6%)                                             | 0         | 1.00                 | 234 (26%)                                                 | 27 (43%)  | 0.004                | 130 (26%)                                              | 23 (56%)  | <0.001               |
| Cardiovascular disease                    | 2 (2%)                                             | 0         | 1.00                 | 310 (35%)                                                 | 38 (61%)  | <0.001               | 227 (45%)                                              | 27 (66%)  | 0.01                 |
| Dermatologic conditions                   | 5 (6%)                                             | 0         | 1.00                 | 269 (30%)                                                 | 17 (27%)  | 0.62                 | 205 (41%)                                              | 16 (39%)  | 0.82                 |
| Diabetes                                  | 4 (5%)                                             | 1 (50%)   | 0.12                 | 263 (30%)                                                 | 28 (45%)  | 0.01                 | 117 (23%)                                              | 19 (46%)  | 0.001                |
| Eye disease                               | 8 (10%)                                            | 0         | 1.00                 | 377 (43%)                                                 | 34 (55%)  | 0.06                 | 233 (46%)                                              | 13 (32%)  | 0.07                 |

|                            |          |   |      |           |          |      |           |          |       |
|----------------------------|----------|---|------|-----------|----------|------|-----------|----------|-------|
| Gastrointestinal diseases  | 5 (6%)   | 0 | 1.00 | 196 (22%) | 20 (32%) | 0.07 | 175 (35%) | 13 (32%) | 0.68  |
| Genitourinary disease      | 3 (4%)   | 0 | 1.00 | 255 (29%) | 26 (42%) | 0.03 | 170 (34%) | 17 (41%) | 0.32  |
| Headaches                  | 0        | 0 | -    | 67 (8%)   | 7 (11%)  | 0.29 | 92 (18%)  | 8 (19%)  | 0.85  |
| Hyperlipidemia             | 3 (4%)   | 0 | 1.00 | 409 (46%) | 24 (39%) | 0.25 | 253 (50%) | 18 (44%) | 0.42  |
| Hypertension               | 13 (16%) | 0 | 1.00 | 623 (70%) | 47 (76%) | 0.37 | 363 (72%) | 31 (76%) | 0.65  |
| Liver disease              | 0        | 0 | -    | 30 (3%)   | 4 (6%)   | 0.21 | 21 (4%)   | 6 (15%)  | 0.003 |
| Musculoskeletal conditions | 4 (5%)   | 0 | 1.00 | 388 (44%) | 35 (56%) | 0.05 | 320 (64%) | 23 (56%) | 0.33  |
| Respiratory tract disease  | 1 (1%)   | 0 | 1.00 | 194 (22%) | 20 (32%) | 0.06 | 159 (32%) | 18 (44%) | 0.11  |
| Thyroid problem            | 2 (2%)   | 0 | 1.00 | 208 (23%) | 19 (29%) | 0.33 | 162 (32%) | 11 (27%) | 0.47  |

p-value<sup>a</sup>: from Fisher's exact test

p-value<sup>b</sup>: from Chi-square statistic
